# Supplementary material for: Evidence-Based Physical Therapy Practice in the State of Kuwait: A Survey of Attitudes, Beliefs, Knowledge, Skills, and Barriers
Source: PubMed Central journal article supplement (PMC6682286; doi:10.2196/12795), 2019-06-07
Supplement: mededu_v5i1e12795_app1.pdf [file mededu_v5i1e12795_app1.pdf]

## Appendix 1: Interview questions

|                                                                                                                                                                                                                                                                                                                                                                                                                                                                                                                                                                                                                                      |
|--------------------------------------------------------------------------------------------------------------------------------------------------------------------------------------------------------------------------------------------------------------------------------------------------------------------------------------------------------------------------------------------------------------------------------------------------------------------------------------------------------------------------------------------------------------------------------------------------------------------------------------|
| <b>1. Demographic information</b>                                                                                                                                                                                                                                                                                                                                                                                                                                                                                                                                                                                                    |
| <ul style="list-style-type: none"><li>• Including participant's age, gender, education, and years of experience</li></ul>                                                                                                                                                                                                                                                                                                                                                                                                                                                                                                            |
| <b>2. Background, knowledge, attitudes, and skills for EBP</b>                                                                                                                                                                                                                                                                                                                                                                                                                                                                                                                                                                       |
| <ul style="list-style-type: none"><li>• Have you heard about EBP? Attended any workshop?, seminar?, etc.</li><li>• Are you willing to adopt EBP into PT?</li><li>• What are the staff abilities in order to practice this approach?<ul style="list-style-type: none"><li>• Knowledge and skills required for EBP</li></ul></li></ul>                                                                                                                                                                                                                                                                                                 |
| <b>3. Opinions on implementing EBP</b>                                                                                                                                                                                                                                                                                                                                                                                                                                                                                                                                                                                               |
| <ul style="list-style-type: none"><li>• What do you think about the importance of the need for evidence-based PT?</li><li>• Is PT staff ready for this evidence-based practice?</li></ul>                                                                                                                                                                                                                                                                                                                                                                                                                                            |
| <b>4. Barriers and facilitators to adopting EBP in the physical therapy field</b>                                                                                                                                                                                                                                                                                                                                                                                                                                                                                                                                                    |
| <ul style="list-style-type: none"><li>• What are the factors that obstacle the adoption of EBP in the PT field?<ul style="list-style-type: none"><li>• Staff resistance, such as lack of interest, or lack of knowledge and skills for EBP. Moreover, the influence of the culture of the organization on adopting new technique for PT</li></ul></li><li>• What are the factors that facilitate the adoption of EBP in the PT field?<ul style="list-style-type: none"><li>• Upper management support, physical requirement, such as computer station, internet connection, and free access to medical databases</li></ul></li></ul> |
