# Supplementary material for: Evidence-Based Physical Therapy Practice in the State of Kuwait: A Survey of Attitudes, Beliefs, Knowledge, Skills, and Barriers
Source: PubMed Central journal article supplement (PMC6682286; doi:10.2196/12795), 2019-06-07
Supplement: mededu_v5i1e12795_app2.pdf [file mededu_v5i1e12795_app2.pdf]

Appendix 2. Barriers and solutions

| Barrier                                             | Solutions                                                                                                                                                                                                                                                         |
|-----------------------------------------------------|-------------------------------------------------------------------------------------------------------------------------------------------------------------------------------------------------------------------------------------------------------------------|
| Busy staff schedule                                 | <ul style="list-style-type: none"> <li>• Time management (e.g., assigning less work to two PTs so that they can perform EBP tasks)</li> <li>• A formal decision from the upper management to authorize and include EBP in PT</li> </ul>                           |
| Lack of communication skills of some PT specialists | <ul style="list-style-type: none"> <li>• Improve communication skills with medical staffs, patients, and academic PTs</li> <li>• Run awareness campaigns to improve collaboration among medical staff and with patients to increase patient confidence</li> </ul> |
| Lack of motivation                                  | <ul style="list-style-type: none"> <li>• Offer incentives at early stages</li> <li>• Hold awareness sessions to motivate staff and increase their willingness to provide the best care to patients</li> </ul>                                                     |
| Need for proper management                          | <ul style="list-style-type: none"> <li>• Offer continuous support</li> <li>• Gradually apply new practices in PT to ensure accuracy, completeness, and continuance</li> </ul>                                                                                     |
| Patient attitudes                                   | <ul style="list-style-type: none"> <li>• Develop awareness guidelines about EBP for patients and disseminate them through bulletin boards, brochures, and roll-up banners.</li> <li>• Involve patients in the treatment process.</li> </ul>                       |
| Lack of interest in adding new practices            | <ul style="list-style-type: none"> <li>• Organize awareness sessions for staff to highlight the positive outcomes of EBP</li> <li>• Arrange workshops, local or abroad, for those staff who are willing to gain EBP knowledge and skills</li> </ul>               |
